# Supplementary material for: Analysis of biofilm and bacterial communities in the towel environment with daily use
Source: Sci Rep. 2023 May 10;13:7611. doi: 10.1038/s41598-023-34501-4 (PMC10172380; doi:10.1038/s41598-023-34501-4)
Supplement: Supplementary file 2 — Supplementary Tables. [file 41598_2023_34501_MOESM2_ESM.xlsx]

## Sheet: Table of Contents
Supplementary tables - table of contents:
Supplementary Table 1	Metadata of the used towels for indirect gradient analysis
Supplementary Table 2	Metadata of the used towels for Spearman's rank correlation tests
Supplementary Table 3	Metadata of the recontaminated towels for Spearman's rank correlation tests

## Sheet: Supplemenatly Table 1
Supplementary Table 1: Metadata of the used towels for indirect gradient analysis
(1) Sample ID was formatted as following: <Household><1: two month/ 2: four month/ 3: six month ><R: used>. I2R, K1R, K2R, AJ1R and AO2R were excluded due to the small number of sequence reads for the ingradient analysis.
(2) Changes in whiteness (W) with use, washing, and drying were defined using the following formula; Delta whiteness 1 (Dw1): (W value of new towel) - (W value of used towel).
(3) Changes in whiteness (W) with use only were defined using the following formula; Delta whiteness 2 (Dw2): (W value of recontaminated towel) - (W value of used towel).
(4) Odour intensity and character were not analyzed for N3R or O3R towels.
(5) "0" indicates that the corresponding odor was not detected and "1" indicates that the corresponding odor was detected.
(6) Each quantitative value indicates analyte per gram of towel.
(7) "Outdoor": basically drying clothes outside; "Indoor": basically drying clothes in house; and "Machine": basically drying clothes in dryer.
(8) Household E stopped using the towels at 4 months.
Sample ID (1)	Dullness		Odour (4)							Biofilm components (6)					Other metadata
			Intensity	Character (5)
ID	Dw1 (2)	Dw2 (3)	Odour intensity	4M3H	Isovaleric acid	Musty	Fragrance	Acid	Sebum	Viable Counts_PDA (Log(CFU/g))	Viable Counts_SCDA (Log(CFU/g))	EPS_Polysaccharides (mg/g)	EPS_DNA (µg/g)	EPS_Protein (mg/g)	Washing frequency (times/week)	Washing machine types (Front/Top loader)	Years of use of the washing machine (1: less than 1 year, 2: 1-3 years, 3: 3-5 years, 4: 5-10 years, 5: more than 10 years )	Drying method (7)	Frequency of using bleach (1: none, 2: sometimes, 3: always)	Frequency of using washing tank cleaners (1: none, 2: seldom, 3: once a year, 4: every 6 months, 5: every 2 or 3 months, 6: once a month)	Geographical location (Wakayama pref./ Tochigi pref.)	Number of family	Household	Month	Total number of washes (8)
A1R	18.3243	10.2247	3	0	0	0	0	0	1	6.19825	6.01412	2732.6	2.03667	3.2032	16	Top	2	Outdoor	1	1	Wakayama	5	A	2	34
A2R	28.9503	15.5714	3.5	0	0	0	0	1	1	6.14241	5.53565	2826.82	3.6	4.94244	16	Top	2	Outdoor	1	1	Wakayama	5	A	4	77
A3R	37.6131	16.8	3	0	0	0	1	0	1	6.89687	7.85458	3628.38	24.1	8.85886	16	Top	2	Outdoor	1	1	Wakayama	5	A	6	107
B1R	0.186915	6.35056	2	0	0	0	0	0	1	5.13287	7.25016	2640.9	5.03333	2.43994	10	Front	2	Outdoor	1	1	Wakayama	4	B	2	14
B2R	8.33598	9.90372	2	0	0	0	0	0	1	5.63558	5.79048	2674.64	11.1	4.46071	10	Front	2	Outdoor	1	1	Wakayama	4	B	4	52
B3R	15.8881	5.7	2.5	0	0	0	0	0	1	6.17742	7.73343	2564.96	13.7333	4.71722	10	Front	2	Outdoor	1	1	Wakayama	4	B	6	67
C1R	7.1227	2.99718	2	0	0	0	0	0	1	3.79588	3.94201	1928.95	1.14667	2.22723	12	Top	1	Outdoor	1	2	Wakayama	2	C	2	19
C2R	-2.02552	2.93907	2	0	0	0	0	0	1	4.62108	4.32005	888.444	0.58	2.62763	12	Top	1	Outdoor	1	2	Wakayama	2	C	4	56
C3R	6.31608	3.1	2.5	0	0	0	0	0	1	5.34205	4.90411	695.46	0.55	2.1021	12	Top	1	Outdoor	1	2	Wakayama	2	C	6	86
D1R	-8.22063	1.15283	2	0	0	0	0	0	1	4.52671	7.53799	2499.05	2.34	1.47022	8	Top	3	Outdoor	2	2	Wakayama	3	D	2	22
D2R	-4.60135	6.94326	2.5	0	0	0	0	0	1	5.82893	4.98632	2951.08	10.8333	4.12287	8	Top	3	Outdoor	2	2	Wakayama	3	D	4	49
D3R	5.31813	17.9	3	0	0	0	0	0	1	7.00357	8.40858	3396.88	12.6	5.16767	8	Top	3	Outdoor	2	2	Wakayama	3	D	6	71
E1R	-4.66507	2.03244	4	1	1	1	0	1	1	6.99525	7.9393	1203.45	1.91	1.70796	7	Front	5	Outdoor	2	2	Wakayama	2	E	2	17
E2R	7.75374	6.89778	3	1	0	0	0	0	1	5.96379	4.11394	1200.47	2.89333	2.02077	7	Front	5	Outdoor	2	2	Wakayama	2	E	4	34
E3R	6.49229	7.8	3	1	0	0	0	1	1	6.11697	7.08571	952.785	1.94333	1.75801	7	Front	5	Outdoor	2	2	Wakayama	2	E	6	34
F1R	-1.79571	1.70961	3	0	1	0	0	1	1	4.9948	6.6072	841.148	1.24	2.002	7	Top	2	Outdoor	1	1	Wakayama	2	F	2	20
F2R	11.1492	0.796896	2	0	0	0	0	1	1	5.72478	4.28753	1250.83	1.46333	2.72773	7	Top	2	Outdoor	1	1	Wakayama	2	F	4	55
F3R	-0.72227	5.13931	2.5	0	0	0	1	0	1	7.47834	7.02826	1295.88	1.58667	2.05205	7	Top	2	Outdoor	1	1	Wakayama	2	F	6	73
G1R	-13.7594	1.01122	2.5	0	0	0	0	0	1	4.17807	4.17807	844.762	0.226667	0.882132	7	Top	1	Outdoor	1	4	Wakayama	3	G	2	19
G2R	5.06129	9.65601	2.5	0	0	0	0	0	1	6.14324	3.99711	1197.18	2.48	2.10836	7	Top	1	Outdoor	1	4	Wakayama	3	G	4	41
G3R	5.89325	0.527598	2.5	0	0	0	1	0	1	6.19216	5.41642	1644.83	1.99	2.65265	7	Top	1	Outdoor	1	4	Wakayama	3	G	6	59
H1R	2.99	1.63547	2	0	0	0	0	1	1	4.41913	2.77728	1544.06	0.393333	1.36386	20	Top	4	Indoor	1	1	Wakayama	5	H	2	18
H2R	10.514	0.715754	2	0	0	0	0	0	1	6.11447	5.79172	1277.65	0.41	1.90816	20	Top	4	Indoor	1	1	Wakayama	5	H	4	60
H3R	9.44138	1.39708	2.5	0	0	0	1	0	1	5.01914	5.53446	1116.05	1.02	1.98323	20	Top	4	Indoor	1	1	Wakayama	5	H	6	88
I1R	-18.3755	3.87927	2	0	0	0	0	1	1	4.51792	2.77728	665.872	0.206667	0.563063	16	Top	5	Machine	3	2	Wakayama	4	I	2	22
I3R	-20.4123	-0.722739	2.5	0	0	0	1	0	1	3.98928	2.77728	861.161	0	0.375376	16	Top	5	Machine	3	2	Wakayama	4	I	6	86
J1R	11.5039	8.15104	2.5	0	0	0	0	1	1	4.95725	6.58593	793.715	3.9	2.71522	14	Top	3	Indoor	2	4	Wakayama	3	J	2	20
J2R	15.4876	5.08195	2	0	0	0	0	0	1	5.97828	5.92504	1087.7	1.88	3.23448	14	Top	3	Indoor	2	4	Wakayama	3	J	4	40
J3R	19.1928	10.6	2.5	0	0	0	1	0	1	5.24636	6.17453	1486.44	5.2	5.44294	14	Top	3	Indoor	2	4	Wakayama	3	J	6	66
K3R	9.71885	7.4	2.5	0	0	0	1	0	1	3.77599	6.27084	1263.23	0.863333	3.56607	8	Top	3	Machine	1	3	Wakayama	4	K	6	81
L1R	-0.0885493	0.834218	2	0	0	0	0	1	0	4.59346	5.52288	733.181	0.583333	0.788288	14	Top	3	Outdoor	2	2	Wakayama	3	L	2	28
L2R	7.3026	11.9983	2	0	0	0	0	0	1	5.67778	6.09938	1307.76	2.47	1.63914	14	Top	3	Outdoor	2	2	Wakayama	3	L	4	57
L3R	7.7756	8.9	2.5	0	0	0	1	1	1	6.53057	6.90982	1583.43	6.03333	3.47848	14	Top	3	Outdoor	2	2	Wakayama	3	L	6	78
M1R	-9.90834	1.37143	2	0	0	0	0	0	1	3.36653	3.49147	950.019	0.243333	0.675676	12	Top	1	Machine	3	3	Wakayama	4	M	2	22
M2R	-6.7	0.569833	2.5	0	0	0	0	0	1	3.20412	2.90309	767.466	0.303333	0.563063	12	Top	1	Machine	3	3	Wakayama	4	M	4	54
M3R	5.20877	1.6	2.5	0	0	0	1	1	1	3.96166	5.18015	803.166	0.603333	1.15115	12	Top	1	Machine	3	3	Wakayama	4	M	6	101
N1R	22.8416	14.6473	2	0	0	0	0	0	1	6.58838	6.92684	1470.43	16.9333	6.60035	9	Top	5	Outdoor	1	1	Wakayama	3	N	2	24
N2R	35.2098	28.5532	3	0	0	0	0	0	1	8.20498	7.82391	5301.65	9.16667	6.83183	9	Top	5	Outdoor	1	1	Wakayama	3	N	4	52
N3R	55.4457	42.4363	NA	NA	NA	NA	NA	NA	NA	7.69202	6.76295	7090.29	25.9333	12.7377	9	Top	5	Outdoor	1	1	Wakayama	3	N	6	79
O1R	3.02655	5.1529	2.5	0	0	0	1	0	1	8.11279	8.08476	1199.83	3.24	1.88939	16	Front	4	Indoor	2	2	Wakayama	3	O	2	20
O2R	10.3359	11.5359	2.5	0	0	0	1	0	1	6.99203	6.70159	2342.91	3.27	2.98423	16	Front	4	Indoor	2	2	Wakayama	3	O	4	38
O3R	13.7371	11.0475	NA	NA	NA	NA	NA	NA	NA	7.08571	7.60206	3888.18	6.4	3.09685	16	Front	4	Indoor	2	2	Wakayama	3	O	6	68
AB1R	-4.18409	9.19588	3.5	1	0	0	0	1	1	4.93751	5.96747	1485.34	3.27	1.6454	7	Top	2	Indoor	3	6	Tochigi	2	AB	2	22
AB2R	-6.79858	7.55671	3.5	1	0	0	1	1	1	6.89734	7.62434	1320.9	10.1667	3.12813	7	Top	2	Indoor	3	6	Tochigi	2	AB	4	42
AB3R	3.58454	16.3	2.5	0	0	0	1	0	1	7.29528	8.52629	5322.92	17.3667	4.5483	7	Top	2	Indoor	3	6	Tochigi	2	AB	6	61
AD1R	9.7723	5.02166	3.5	1	0	0	0	1	1	6.62677	6.79353	2148.95	10.4	4.42317	9	Top	4	Outdoor	3	5	Tochigi	4	AD	2	23
AD2R	31.6582	17.1123	2.5	0	0	0	0	0	1	6.59995	6.04786	4450.43	20.3	8.80881	9	Top	4	Outdoor	3	5	Tochigi	4	AD	4	43
AD3R	42.0551	26.1	3	0	0	0	1	0	1	7.84779	7.60206	6683.14	24.2667	10.0976	9	Top	4	Outdoor	3	5	Tochigi	4	AD	6	81
AE1R	2.26272	1.56368	3	0	0	1	0	1	1	5.58225	5.55229	929.239	1.89333	1.5015	7	Top	1	Indoor	1	5	Tochigi	2	AE	2	23
AE2R	8.41099	0.853963	3	1	0	0	0	0	0	5.9339	6.10801	1308.31	0.656667	1.61411	7	Top	1	Indoor	1	5	Tochigi	2	AE	4	35
AE3R	27.5658	6.8	3	1	0	0	0	0	1	7.79758	8.71568	2718	4.2	5.02377	7	Top	1	Indoor	1	5	Tochigi	2	AE	6	46
AF1R	5.85036	1.20803	2.5	0	0	0	0	1	1	4.98449	5.82391	1688.75	0.693333	1.88313	10	Top	4	Outdoor	3	5	Tochigi	4	AF	2	15
AF2R	16.0234	3.38053	2.5	0	0	0	0	0	1	5.41234	5.64167	1655.36	5.76667	2.85285	10	Top	4	Outdoor	3	5	Tochigi	4	AF	4	43
AF3R	23.6527	0.1	2.5	0	0	0	0	0	1	6.72774	7.39195	1703.32	9.63333	4.42943	10	Top	4	Outdoor	3	5	Tochigi	4	AF	6	60
AG1R	9.00891	3.41292	2.5	0	0	0	0	0	1	5.967	6.81858	1886.03	2.13	2.57132	14	Front	4	Outdoor	1	3	Tochigi	4	AG	2	17
AG2R	10.0386	6.17912	2.5	0	0	0	0	0	1	5.79454	6.08745	1110.69	2.75667	2.12087	14	Front	4	Outdoor	1	3	Tochigi	4	AG	4	29
AG3R	8.58789	0.0707698	2.5	0	0	0	0	0	1	6.67474	7.26962	1418.7	3.5	2.5463	14	Front	4	Outdoor	1	3	Tochigi	4	AG	6	38
AH1R	-9.89803	9.43578	3	1	0	0	0	1	1	5.35218	5.8893	1428.42	3.00667	1.68919	12	Front	4	Machine	2	2	Tochigi	3	AH	2	27
AH2R	-9.64695	6.58561	2	0	0	0	0	0	1	5.04758	6.0135	970.008	3.83333	1.93318	12	Front	4	Machine	2	2	Tochigi	3	AH	4	49
AH3R	-2.23738	11.1353	2.5	0	0	0	0	0	1	6.8254	8.65155	1562.47	6.3	3.16567	12	Front	4	Machine	2	2	Tochigi	3	AH	6	100
AI1R	7.17489	6.90113	4	0	1	0	0	1	0	5.49875	6.74707	1047.6	3.19667	1.82683	10	Top	3	Outdoor	2	1	Tochigi	4	AI	2	14
AI2R	14.1333	7.27887	2	0	0	0	1	1	1	5.41934	5.95861	1823.96	9.83333	4.82357	10	Top	3	Outdoor	2	1	Tochigi	4	AI	4	34
AI3R	5.12909	0.225794	2.5	0	0	0	0	0	1	6.45093	4.64616	1788.6	3.9	2.07708	10	Top	3	Outdoor	2	1	Tochigi	4	AI	6	45
AJ2R	-5.22659	7.86048	2	0	0	0	0	0	1	2.77728	2.77728	717.652	0	0.594344	10	Top	5	Outdoor	2	5	Tochigi	4	AJ	4	54
AJ3R	-0.149196	-1.24308	2	0	0	0	0	0	1	5.49371	4.31044	1053.18	0	0.644394	10	Top	5	Outdoor	2	5	Tochigi	4	AJ	6	80
AK1R	5.91609	2.56517	2.5	0	0	0	0	0	1	6.01143	6.88081	627.925	2.74333	2.3023	7	Top	2	Outdoor	3	5	Tochigi	4	AK	2	21
AK2R	45.9783	29.5262	2	0	0	0	0	0	1	6.02078	6.04062	959.059	4.43333	3.8038	7	Top	2	Outdoor	3	5	Tochigi	4	AK	4	47
AK3R	22.0621	11.0662	2.5	0	0	0	1	0	1	6.20859	5.81065	2118.06	3.17333	4.90491	7	Top	2	Outdoor	3	5	Tochigi	4	AK	6	71
AM1R	22.4055	23.0257	3	0	0	1	0	0	1	6.18378	7.85927	1591.04	12.9333	5.69945	8	Front	3	Indoor	1	1	Tochigi	4	AM	2	20
AM2R	15.2942	7.99838	2	0	0	0	0	0	1	7.11197	7.73176	2617.16	26.2	8.50851	8	Front	3	Indoor	1	1	Tochigi	4	AM	4	42
AM3R	43.3935	34.6222	2.5	0	0	0	0	0	1	9.08449	9.43104	3600.11	30.1	10.6607	8	Front	3	Indoor	1	1	Tochigi	4	AM	6	61
AO1R	1.16903	4.75409	2.5	0	0	1	0	1	1	4.6072	5.56708	780.615	0.88	1.2012	7	Top	1	Outdoor	1	4	Tochigi	3	AO	2	15
AO3R	-6.06027	0.0914316	2.5	0	0	0	0	0	1	5.55223	6.55223	1077.06	0.306667	1.43894	7	Top	1	Outdoor	1	4	Tochigi	3	AO	6	34

## Sheet: Supplementary Table 2
Supplementary Table 2: Metadata of the used towels for Spearman's rank correlation tests
(1) Sample ID was formatted as following: <Household><1: two month/ 2: four month/ 3: six month ><R: used>.
(2) Bacteria (genus level) with a mean abundance >0.1% were selected.
(3) Metadata of dullness and biofilm components were extracted from all the metadata of the used towels.
(4) Changes in whiteness (W) with use, washing, and drying were defined using the following formula; Delta whiteness 1 (Dw1): (W value of new towel) - (W value of used towel).
(5) Changes in whiteness (W) with use only were defined using the following formula; Delta whiteness 2 (Dw2): (W value of recontaminated towel) - (W value of used towel).
(6) Each quantitative value indicates analyte per gram of towel.
Sample ID (1)	Genus (2)																																														Extracted metadata (3)
																																															Dullness		Biofilm components (6)
ID	Enhydrobacter	Sphingomonas	Methylobacterium-Methylorubrum	Pseudomonas	Skermanella	Paracoccus	Roseomonas	Brevundimonas	Micrococcus	Allorhizobium-Neorhizobium-Pararhizobium-Rhizobium	Kocuria	Dermacoccus	Cutibacterium	Serratia	Aureimonas	Acinetobacter	Mycobacterium	Intrasporangiaceae genus	Sphingomonadaceae genus	Burkholderia-Caballeronia-Paraburkholderia	Chryseobacterium	Streptococcus	Corynebacterium	Propionibacteriaceae genus	Rhizobiaceae genus	Comamonadaceae genus	Bacillus	Williamsia	Amaricoccus	Staphylococcus	Tepidisphaeraceae	Escherichia-Shigella	Candidatus_Alysiosphaera	Carnobacterium	Acetobacteraceae genus	Dermacoccaceae genus	Marinilutecoccus	Neisseria	Gordonia	Actinomyces	Microbacterium	Tepidisphaera	Rubellimicrobium	Micavibrionales genus	Lautropia	Luteimonas	Dw1(4)	Dw2(5)	Viable counts_PDA (Log(CFU/g))
A1R	20.2737	23.2133	37.3016	0.417142	5.03503	1.62294	0.1825	2.86459	0.140134	0.0619195	0	0	0	0.0716963	6.85351	0	0	0.0260714	0.234642	0.0260714	0	0.0162946	0	0	0.413883	0	0	0.0195535	0.0488838	0.0260714	0	0	0	0.0391071	0.140134	0	0	0	0	0	0.0488838	0	0.0195535	0	0	0	18.3243	10.2247	6.19825
A2R	16.9351	5.90942	34.5569	0.0755417	4.58057	4.73852	0.370841	4.5634	0.233492	0.415479	0.140782	0	0	0	11.7811	0	3.67064	0.072108	0.346805	0	0	0	0	0	6.52062	0	0	0.700477	0.00686742	0.0515057	0.391443	0	0	0	2.46884	0	0	0	0.00686742	0	0.0274697	0	0	0.154517	0	0	28.9503	15.5714	6.14241
A3R	37.5146	15.7763	18.0222	0	3.61223	3.77775	0.172011	1.60652	0	0.551733	0.0194729	0.012982	0.012982	0	6.42931	0.0292094	0.785408	0	2.00896	0	0.0292094	0	0.00973647	0	3.61872	0	0	0	0	0.10061	1.91159	0	0	0	2.42438	0	0	0	0	0	0	0	0	0.249903	0	0	37.6131	16.8	6.89687
B1R	66.5666	5.29021	0.144481	0.466783	0.388986	3.85652	3.35362	8.57437	0.966908	0.0138924	0.361201	0.0583479	0.0138924	0.0750188	2.48951	0.105582	0.0750188	0	0	0	0.177822	0	0.0500125	0	0	0	0	0.0833542	0.0250063	0.0944681	0	0.0138924	0	0.0194493	0.0444556	0	0	0	0	0	0	0	0	0	0	0.00833542	0.186915	6.35056	5.13287
B2R	28.4859	5.39672	6.12756	2.79479	5.79936	27.6468	7.20352	9.28439	0.0947386	0	0.071054	0	0.0270682	0.0135341	5.03806	0.0135341	0.0406023	0.0236847	0.0981221	0	0	0	0.0372187	0	0	0	0.0101506	0.111656	0	0.0507528	0	0	0	0	0.450008	0	0	0	0	0	0.0236847	0	0	0	0	0	8.33598	9.90372	5.63558
B3R	33.2393	16.114	6.8164	0.109752	4.5704	16.016	7.79633	7.05158	0.0862339	0	0.0352775	0.0313578	0.0156789	0	2.08529	0.0548761	0.0666353	0.0274381	4.24114	0	0.0862339	0	0.0391972	0	0	0	0	0.0862339	0	0.0548761	0.0156789	0	0	0	0.305738	0	0	0	0	0	0	0	0	0	0	0	15.8881	5.7	6.17742
C1R	9.66056	11.2612	15.8287	16.4731	8.85873	3.10932	1.30668	0.157396	0.0148487	0.0386066	0	0.656312	11.0742	0.688979	0.0296974	0	0.0980014	0	0	2.257	0	2.65792	2.37876	0	0	0	3.56963	0	0	4.90304	0	0.561281	0	0	0	0	0	0	0	1.26214	0	0	0	0	0	0	7.1227	2.99718	3.79588
C2R	40.2141	6.09665	22.0996	6.76283	11.3487	0.731599	2.09963	0.312268	0	0.455019	0.437175	1.88848	2.05502	0.585874	1.24015	0	0	0	1.06171	0.455019	0	0	0.576952	0	0	0	0.362825	0.184387	0	0.440149	0	0.148699	0	0.127881	0	0.169517	0	0	0	0.0297398	0	0	0	0	0	0	-2.02552	2.93907	4.62108
C3R	28.1616	28.9082	24.1289	0.598682	13.245	0.480963	0.992197	0.100901	0.134535	0.117718	0.114355	0.326248	0.460783	0.164806	0.279161	0	0	0	0.427149	0.026907	0	0.110992	0.242163	0	0	0	0.0134535	0	0	0.480963	0	0.0235437	0	0.0134535	0	0	0.0201803	0.0504507	0	0.0302704	0	0	0	0	0	0	6.31608	3.1	5.34205
D1R	49.16	0.206266	0.182351	3.653	0.083702	21.906	0.0687552	0.564989	5.58113	0.520148	1.34521	0.0597872	0.113596	0.176372	0.1405	9.84097	0.636733	0.0269042	0	0.0866914	0	0	1.20172	0	0	0.911754	0.0956595	0	0.0657659	0.786201	0	0.0149468	0	0.131532	0	0	0	0	0	0	0	0	0	0	0	0	-8.22063	1.15283	4.52671
D2R	11.071	6.72497	28.3625	0.0537281	0.611904	13.6828	1.185	10.4442	12.0082	4.66838	1.9163	0.14626	0.0447734	0.00596979	0.15223	0.0179094	0.301475	2.97594	0	0	0	0.0238792	4.23557	0	0	0	0	0	0.0179094	0.0149245	0	0	0	0.00596979	0	0	0	0	0	0	0.217897	0	0	0	0	0	-4.60135	6.94326	5.82893
D3R	9.36137	3.88989	19.7529	0.021373	1.51748	18.8638	1.26528	17.4104	4.19338	2.84688	0.688211	0	0	0	0.397538	0	0.31632	7.06164	0.0683936	0	0	0	4.8132	0	0	0	0	0	0	0.0341968	0	0	0	0	0	0	0	0	0	0	0.222279	5.06113	0	0	0	0	5.31813	17.9	7.00357
E1R	65.3633	18.7402	4.22399	0.177731	0.138491	0	2.22971	2.24818	0.0230819	2.94063	0.110793	0.0923276	0.334687	0.0392392	0.00692457	0.0346228	1.89964	0	0.1408	0.0323147	0	0	0.0830948	0	0	0	0.0761703	0	0	0.103869	0	0	0.0230819	0.0207737	0.0553965	0	0	0	0	0	0	0	0	0	0	0	-4.66507	2.03244	6.99525
E2R	29.4033	18.5622	19.6427	0.0821045	0.0558311	0.249598	19.0811	0.837466	0.453217	2.9886	2.19055	0.213472	0.22004	0.0229893	0	0.00985254	0.509048	0.0197051	0.505764	0	0	0.0459785	0.0821045	0	0.443364	0	2.12486	0	0	0.315281	0	0	0.174062	0.0131367	0.0262734	0	0	0	0	0	0.0131367	0	0	0	0	0	7.75374	6.89778	5.96379
E3R	45.7311	14.5673	15.2265	0.0900408	0.0578834	0.0418047	17.6673	0.382674	0.12863	1.30881	0.463067	0.0675306	0.205808	0.0192945	0	0	0.0289417	0	0.315143	0	0	0.0289417	0.144708	0	0	0	2.51793	0	0	0.440557	0	0	0.025726	0	0.0482362	0	0	0	0	0.00643149	0.012863	0	0	0	0	0	6.49229	7.8	6.11697
F1R	51.0866	40.4041	2.17624	1.24706	0.110035	0.0152826	0.0122261	0.0733564	0	0	0.0336217	0.0397347	1.0331	0.290369	0	0.715225	0	0	0.103922	0.0458477	0	0.00916954	0.00916954	0	0	0.0641868	0.0886389	0	0	0.519608	0	0	0	0	0	0	0	0	0	0	0	0	0	0.0366782	0	0	-1.79571	1.70961	4.9948
F2R	8.91107	77.173	8.04336	1.86573	0.168804	0	0.40276	0.0977286	0	0	0	0.225072	0.20138	0.156958	0	0.70483	0.0266532	0	0.0740368	0.165842	0.0207303	0	0.438298	0	0	0.0710753	0.0207303	0	0	0	0	0	0	0	0	0	0	0	0	0	0	0	0	0	0	0	11.1492	0.796896	5.72478
F3R	11.5494	56.4656	29.0795	0.367087	0.0484832	0.0207785	1.46835	0	0	0	0	0.0311678	0.301288	0.0311678	0	0.193933	0.041557	0	0	0	0	0.0761878	0.0519463	0	0	0	0	0	0	0.0277047	0	0	0	0	0.0207785	0	0	0	0	0.0380939	0	0	0	0	0	0	-0.72227	5.13931	7.47834
G1R	3.0154	35.6761	20.4221	3.22898	35.8813	0.0309128	0.252923	0.157374	0.0758768	0	0.255733	0.044964	0.236061	0.247302	0.0252923	0.0786871	0	0	0.0252923	0.140513	0	0	0.011241	0	0	0	0	0	0	0	0.0056205	0	0	0	0	0	0	0	0	0	0	0	0	0	0	0	-13.7594	1.01122	4.17807
G2R	12.3485	2.43525	64.5395	0.193274	15.6622	0.203816	1.35995	0.210844	0.0562252	1.873	0.344379	0.0632533	0.0702815	0.0281126	0	0	0.0351407	0.115964	0	0.0140563	0	0.0210844	0	0	0.101908	0	0.0105422	0	0	0.0351407	0	0	0	0	0.049197	0	0	0.0245985	0	0	0	0	0	0	0	0	5.06129	9.65601	6.14324
G3R	0.97677	3.49696	61.8715	0.400726	21.1978	0.457078	4.83063	0.313067	0.0469601	2.64542	0.0532215	0.0751362	0.259846	0.103312	0	0	0.0281761	2.42001	0	0.0688748	0	0.169056	0	0	0.100182	0	0	0	0	0.0813975	0	0	0	0.0594828	0.200363	0	0	0	0	0	0	0	0	0	0	0	5.89325	0.527598	6.19216
H1R	83.9437	8.24788	3.6399	0.563658	0.105089	0	0	0.242023	0	0.519075	0	0	0.184702	0.0796128	0	0.0668747	0.213362	0.0254761	0.958538	0.0350296	0	0.0286606	0.0668747	0	0	0	0.0318451	0.0318451	0	0.0827973	0	0.012738	0.0541367	0.0286606	0.117827	0	0	0	0	0	0	0	0	0	0	0	2.99	1.63547	4.41913
H2R	49.1592	30.2088	13.8411	1.89557	0.0748603	0.0160415	0.406385	0	0	0.497286	0.0855546	0.122985	0.109617	0.032083	0.475898	0.0240622	0.0454509	0	0.211213	0.0294094	0	0.0481245	0.0614924	0	0.0106943	0.0213887	0.0267358	0.0106943	0.0561452	0.096249	0	0.0481245	0.213887	0.00802075	0.114964	0	0	0	0	0	0	0	0	0.0213887	0	0.0213887	10.514	0.715754	6.11447
H3R	3.80363	9.98988	39.8583	10.0016	1.15238	0.0778634	1.32368	0	0.288095	12.283	0	0.545044	0.728023	0.447715	12.0844	0.0506112	0	0	0.210231	0.373744	0	0	0.408783	0	0	0	0	0	0	0.214124	0	0.580083	0	0.377638	0	0	0	0	0	0.214124	0.0428249	0	0	0	0	0	9.44138	1.39708	5.01914
I1R	9.21033	2.46773	0.22779	30.5239	0.0607441	0.311314	0	0.425209	0.0911162	0.0835232	1.10099	0	37.1754	2.26272	0	0	0.0303721	0	0	3.18907	0	0.933941	0.485953	0	0	0	0.70615	0.0531511	0	5.04935	0	0.652999	0	0	0	0	0	0	0	1.16932	0	0	0	0	3.01443	0	-18.3755	3.87927	4.51792
I2R	3.99878	2.43272	3.07131	64.984	0	0	0.410522	0.091227	0.091227	0.030409	0	0	10.1414	5.64087	0	0	0	0	0	5.56485	0	0	0	0	0	0	0	0	0	0	0	1.03391	0	0.866657	0	0	0	0	0	0	0	0	0	0	0.486544	0	-16.2787	2.51793	2.77728
I3R	0.694754	0.0534426	5.49568	49.3899	0	0.089071	2.18224	3.21546	0.151421	0	0	0	0	17.8587	1.58546	0	0	0	0	0.0623497	0	0	0	0	0	0	0	0	0	1.87049	0	0	0	6.1459	0	0	0	0	0	1.79923	0	0	0	0	0	0	-20.4123	-0.722739	3.98928
J1R	49.1269	3.53401	2.42222	3.14953	28.224	0	5.82807	0.903528	0	0.038448	0.03204	0	0.182628	0.01602	4.15879	0.246708	0.099324	0	0.060876	0.012816	0.0801	0	0.070488	0	0	0.019224	0	0	0.358848	0.105732	0	0	0.009612	0.025632	0.102528	0	0	0	0	0.009612	0	0	0	0	0	0.022428	11.5039	8.15104	4.95725
J2R	23.7848	0.535097	5.15557	8.25492	44.4792	0.0210431	14.2883	0.0721479	0	0.0961972	0.0781602	0	0.808658	0.0480986	0.123253	0.766571	0.10221	0	0	0.0511048	0.496017	0	0.0781602	0	0	0	0	0	0.0480986	0.0871787	0	0.0390801	0	0	0.0811664	0	0	0	0	0.018037	0	0	0	0	0	0	15.4876	5.08195	5.97828
J3R	5.30715	0.170637	0.27859	6.43544	71.5942	0	14.8523	0.160189	0	0.0626828	0	0	0.153225	0.125366	0.29252	0.0905419	0	0	0	0.0313414	0	0.027859	0.0940242	0	0	0	0.0417885	0	0	0.13233	0	0	0.0452709	0	0.0766123	0	0	0	0	0.0139295	0	0	0	0	0	0	19.1928	10.6	5.24636
K1R	15.3972	0.48014	2.64077	29.3867	4.2667	4.79048	0.807508	0	0	2.49891	0	0	3.32824	3.19729	0	2.04059	2.71715	0	0	1.32038	0.261894	2.4007	2.12789	0	0	0	2.33522	0	1.87691	1.05849	0	0	0	1.12396	0	0.120035	0	0	0.0327368	0.218245	0.24007	0	0	0	4.14666	0	-0.662032	0.640336	4.25273
K2R	2.67785	0.258106	0	58.8643	0	0.322633	0.129053	0.19358	0.19358	0	0.241975	0.129053	7.598	6.48492	3.4683	0	0	0	0	7.66253	0	0	0	0	0	0	3.37151	0	0	2.8553	0	3.35538	0	0.19358	0	0	0	0	0	0	0	0	0	0	0	0	10.1838	1.93485	2.91364
K3R	1.33045	0.972892	3.2596	15.7658	5.8623	6.05355	1.76285	0.157991	0	0	0.51555	6.2448	0	5.08066	0	3.82505	8.10743	0.432396	1.05605	0	0.307667	2.02894	5.74588	0.540496	0.673541	0.174622	1.21404	0.399135	3.02678	0.848162	1.19741	2.71079	0	0	0.157991	0.0997838	1.01447	0	0.698487	0	1.04773	0.0498919	0	0	1.08099	0.407451	9.71885	7.4	3.77599
L1R	38.1961	4.13582	0.448594	1.98038	24.7529	5.86455	4.64641	0.0984719	0.536125	0.656479	0.864364	0.310004	0.609067	0.280827	0.160473	6.24385	0.237062	0.598125	0.561654	0.0510595	0.776834	0.634596	0.0656479	0	0.0437653	0	0.0182355	0.0620008	5.03301	0	0.00729421	0.0510595	0	0	0.0547066	0	0	0	0	0	0	0	0	0	0	0	-0.0885493	0.834218	4.59346
L2R	21.7581	31.751	1.52615	3.85911	17.4551	3.5999	14.5713	0.596202	0.0583242	1.09844	0.168492	0	0.0291621	0.0550839	0.149051	0.0162012	0	0.0680448	0.379107	0.042123	0	0.119889	0	0	0.178213	0	0.0226816	0	0.738773	0	0.116648	0.0259218	0	0.0486035	0	0	0	0	0.353185	0	0	0	0	0.0550839	0	0	7.3026	11.9983	5.67778
L3R	5.53481	28.7503	11.3049	0.445546	18.9075	2.45992	21.8318	0.25415	0.116093	4.59352	0.0658906	0.0313765	0.062753	0.0909918	1.07621	0	0	0	0.684007	0	0	0.476923	0.0188259	0	0.718522	0	0	0.0470647	0.922469	0.0251012	0.128644	0.0439271	0	0	0.0188259	0	0	0.0156882	0	0	0.0062753	0.310627	0	0	0	0	7.7756	8.9	6.53057
M1R	10.4838	1.71931	0.351859	49.8521	3.76649	0	9.57217	0.111955	0.0319872	0.0879648	1.59936	0.263894	0	8.70052	0	0	0	0	0	3.23071	0	1.12755	0	0	0	0.719712	0	0	0	0	0	0.59976	0	0	0	0	0	2.58297	0	0	0	0	0	0	0	0	-9.90834	1.37143	3.36653
M2R	3.90714	1.77638	8.32765	45.4909	8.15047	1.2312	1.68098	0	0	0	0	0	4.28876	4.49775	0	0.245332	0	0	0	3.998	0	1.12217	0.104493	0	0	0	0.931353	0	0	0	0	1.78093	0	1.29935	0	0	0	0	0	0.640589	0	0	1.92177	0	0	0	-6.7	0.569833	3.20412
M3R	2.82494	2.66393	0.87822	14.3296	10.2239	0.0951405	9.87998	0.431792	1.57348	0.0219555	0.131733	0.087822	0	3.35187	0.226874	0	0.534251	0	0	0	0	20.243	0.351288	0	0	0	1.60275	0	0	0.395199	0	0	0	0	0	0	0	7.27459	0.541569	3.73975	0	0	0	0	0	0	5.20877	1.6	3.96166
N1R	51.6377	8.59973	1.61409	0.0314432	0.29347	3.02641	8.377	1.15554	0.110051	3.95923	17.5977	0	0.028823	0	0.856828	0	0.311812	0.199141	0.0550257	0	0	0.0157216	0.00524054	0	0.233204	0	0	0.736296	0.178178	0.0235824	0	0	0.0340635	0	0.0366838	0.180799	0	0	0	0	0	0	0.0550257	0	0	0.00524054	22.8416	14.6473	6.58838
N2R	48.9087	17.7771	3.25164	0.0351012	1.27641	2.40283	15.0584	2.95488	0	1.74229	2.35497	0	0	0	0.698832	0.0159551	0.229753	0.0829664	0.0638203	0	0	0	0	0	0.175506	0.0191461	0	0.561618	0.0382922	0.0127641	0	0	0.0382922	0	0.149978	0.146787	0	0	0	0	0	0	1.15196	0	0	0	35.2098	28.5532	8.20498
N3R	37.3774	8.71284	2.67975	0	0.944501	6.89706	13.5232	1.72793	0	3.1703	9.6427	0	0.0219651	0	0.98111	0	1.03236	0.366086	0	0	0	0.0366086	0	0	0.541807	0.754137	0.0585737	5.20574	0.373408	0	0	0	0	0	0.197686	0.270903	0	0	0	0	0	0	2.72368	0	0	0	55.4457	42.4363	7.69202
O1R	15.508	0.763447	1.10276	0.138809	0.0231348	4.12184	4.18354	38.0413	3.46636	0.196645	6.97127	9.36572	0.0115674	0.0231348	0.354733	0	0.0308463	4.91999	0.111818	0	0.111818	0	0.107962	8.41334	0.0732601	0	0	0.451128	0	0	0	0	0.0154232	0	0	0	0	0	0.0154232	0	0.092539	0	0	0	0	0.0616927	3.02655	5.1529	8.11279
O2R	26.8262	3.15952	1.1284	0.0742368	0.0593895	4.34137	4.69771	24.9406	2.34291	0.308825	5.8558	8.24326	0.0178168	0.0148474	0.255375	0	0	2.96057	0.356337	0	0.228649	0	0.133626	12.0887	0.00593895	0	0	0.347428	0	0	0	0	0.0178168	0	0	0	0	0	0.0386032	0	0.0712674	0	0	0	0	0.0296947	10.3359	11.5359	6.99203
O3R	41.007	0.469817	0.567326	0.0177289	0.0620512	4.69817	10.203	8.79355	0.806666	0.549597	9.43179	14.2806	0.0177289	0	2.83663	0.0265934	0	2.1452	0	0	0	0	0.452088	1.00168	0.0265934	0	0	0.842124	0	0	0.15956	0	0.0354578	0	0	0	0	0	0	0	0	0	0	0	0	0	13.7371	11.0475	7.08571
AB1R	59.8323	7.29859	1.78112	1.81862	0.0374973	0.0160703	8.42351	9.72252	0.602636	7.30126	0	0.101778	0.171416	0.0107135	0.18213	0	0	0	0	0	0	0.0133919	0.0428541	0	0	0.291943	0.00803514	0	0	0.302657	0	0	0	0	0	0	0	0	0	0	0.0241054	0	0	0	0	0	-4.18409	9.19588	4.93751
AB2R	43.5956	0.228328	0.449169	1.77422	0.0187154	0	12.3447	23.6712	7.32146	7.13056	0	0.512801	0.0561461	0	0.157209	0.217098	0	0	0	0	0	0	0.0149723	0	0	0.00748615	0	0	0	0	0.0224585	0	0	0	0	0	0	0	0	0	0.14598	0	0	0	0	0	-6.79858	7.55671	6.89734
AB3R	22.6661	0.0578494	0.506183	0.509798	0	0.0433871	17.8212	24.3618	27.7641	4.91359	0	0.274785	0.0723118	0	0.133777	0.0903898	0	0.0361559	0	0	0	0	0	0	0	0.00723118	0	0	0	0.0216935	0	0	0	0	0	0	0	0	0	0	0	0	0	0	0	0	3.58454	16.3	7.29528
AD1R	50.339	21.7458	1.32486	0.0282486	0.884181	5.73446	3.4548	1.0791	0.861582	1.53672	5.77401	0.867232	0.293785	0	0.771186	0	0.0649718	0.019774	0	0	0.0169492	0	0.0621469	0	0.0169492	0	0	0.0169492	0.0649718	0.305085	0	0	0.194915	0	0.435028	0.268362	0	0	0	0	0	0	0.169492	1.20339	0	0	9.7723	5.02166	6.62677
AD2R	28.5244	28.9002	8.96835	0.0271181	0.573355	9.51071	4.68369	1.5651	0.162709	3.21931	6.14419	0.0542362	0.0929764	0	0.56948	0.00774803	0.0619843	0	0.402898	0	0	0	0.0271181	0	0	0.00774803	0	0.100724	0	0.104598	0.309921	0	0.406772	0	0.643087	0	0	0	0	0	0	0.0581103	0.0736063	0.526866	0	0	31.6582	17.1123	6.59995
AD3R	13.9242	24.8423	10.3184	0.0193446	1.85708	12.4734	10.5776	0.50296	0.228266	3.12222	12.8177	0.0889852	0.096723	0	0.305645	0.123805	0.0580338	0	0.294038	0	0	0	0.104461	0	0	0	0	0.42945	0	0.0773784	1.01366	0	1.96541	0	0.518435	0	0	0	0	0	0	0.10833	0.139281	0	0	0	42.0551	26.1	7.84779
AE1R	58.999	18.5503	0.834689	0.306871	0.00920613	2.41814	2.23095	1.42081	3.78679	1.69393	1.76144	0.411207	0.0122748	0.0398932	0.0859238	0.0429619	0.052168	0.073649	0.230153	0.00613742	0.325283	0	0.144229	0	0	0.0368245	0	0.0306871	0	0.162642	0	0	0	0.0245497	0.0859238	0.184123	0	0	0	0	0	0	0	2.61454	0	0	2.26272	1.56368	5.58225
AE2R	62.8674	18.1892	1.44175	1.04037	0.401384	5.26413	3.56863	0.230681	2.03922	1.22261	0.869666	0.694348	0.279123	0.424452	0.113033	0	0.205306	0	0.103806	0.00692042	0	0	0	0	0	0.124567	0.117647	0	0	0.0184544	0	0.0299885	0	0.0645905	0	0.198385	0	0	0	0	0.0761246	0	0	0	0	0	8.41099	0.853963	5.9339
AE3R	30.2552	3.4978	0.654782	0.321054	0.0337952	21.4853	11.0848	1.43207	4.22862	0.815309	14.308	6.51825	0.920919	0	0.0929368	0	0	0.156303	0.0084488	0	0	0.0295708	2.92328	0	0	0	0	0	0	0.0675904	0	0	0	0	0.0126732	0.798412	0	0	0	0.021122	0	0.0168976	0	0	0	0	27.5658	6.8	7.79758
AF1R	39.4141	28.7105	1.52821	0.350279	8.46249	1.39802	0.926844	0.809051	0.139492	1.51581	2.11097	0.257285	0.0154991	0	0.232486	0.148791	1.6615	0	2.04588	0	0.207688	0.034098	0.0185989	0	0.117793	4.05456	0.0309981	0.694358	0.477371	0.0154991	0.179789	0	0	0	0.123993	0.00619963	0	0	0.049597	0	0	0.16119	0.0681959	0.182889	0	0	5.85036	1.20803	4.98449
AF2R	35.2452	19.5468	7.49867	0.792759	3.82181	1.72159	1.13293	0.943619	0	5.53156	0.118322	0.0354967	0.0177483	0.00591611	0.95841	0.357925	0.189316	0.0177483	5.3245	0	0.22777	0	0.0118322	0	0.363841	5.01686	0.00591611	0.0384547	1.23055	0	1.74229	0	0.0177483	0	0.103532	0	0	0	0	0	0	0.257351	0	1.1566	0	0.0414128	16.0234	3.38053	5.41234
AF3R	20.9027	25.3123	10.7377	0.0751637	8.96954	1.00934	0.565518	0.0465299	0	4.13043	0.0930599	0.0501092	0.0107377	0.0107377	1.61423	0	1.15609	0	5.74466	0	0	0	0.0214754	0	0.658578	8.13558	0	0.032213	0.329289	0	1.20978	0	0	0	0.0429507	0	0	0	0	0	0	1.23841	0	0.540463	0	0	23.6527	0.1	6.72774
AG1R	42.5416	3.93275	1.91858	0.0395583	1.05818	5.92715	5.96671	11.1719	14.4355	1.33509	1.06478	0.412065	0.0296687	0	3.14818	0.0131861	0.860392	2.26141	0.21757	0	0.247239	0.0164826	0.0131861	0	0.646118	0	0	0.688973	0.148343	0.0461513	0.273611	0	0.00988957	0	0	0	0	0	0	0	0.332949	0.0296687	0	0.847206	0	0	9.00891	3.41292	5.967
AG2R	60.6693	3.57575	0.674859	0.0906527	0.934226	6.20719	4.44702	10.7801	6.34065	0.594279	0.639605	0.57917	0.0402901	0.0453263	1.76269	0.0705077	0.078062	0.72774	0.100725	0	0	0.020145	0.0151088	0	0.548952	0	0	0.496072	0.0805802	0.0251813	0.0352538	0	0	0	0	0.118352	0	0	0	0	0	0	0	0.0503626	0	0	10.0386	6.17912	5.79454
AG3R	32.1407	0.467438	2.67107	0.0773205	3.89063	30.9458	17.0527	1.00868	1.086	1.3039	2.29853	0.20033	0.137068	0	1.40583	0.024602	0.56936	0.488525	0.151126	0	0	0.0773205	0.00702914	0.0140583	2.12631	0	0	1.20901	0.140583	0.0386602	0	0	0	0	0.0351457	0.140583	0	0.0105437	0	0	0.0210874	0	0	0.00702914	0	0	8.58789	0.0707698	6.67474
AH1R	62.3245	4.03748	0	0.080981	0.0308499	0.242943	0.798242	9.22027	0.77896	14.8851	0.485886	0.316212	0.0385624	0	0	0.0694123	0.0385624	2.76492	0	0	0.0115687	0.0501311	0.00771248	0	0.80981	0	0	0	0	0	0	0	0	0	0	1.92812	0	0	0	0	0	0	0	0	0	0	-9.89803	9.43578	5.35218
AH2R	46.6775	0.735059	0.172087	0.162254	0.012292	0.145045	3.80805	11.938	18.9517	9.7549	0.880104	0.656391	0.12292	0.0172087	0.0639182	0.0614598	0.0221255	4.63407	0	0	0	0.00983357	0	0	0.410551	0	0	0	0	0	0	0	0	0	0	0.381051	0	0	0	0	0	0	0	0	0	0	-9.64695	6.58561	5.04758
AH3R	50.9077	1.97298	0.157518	0.0106792	0.0186886	2.71519	8.40186	9.0613	14.1259	2.1305	0.280329	5.24883	0.0694148	0	0.0453866	0.0106792	0	3.14235	0	0	0	0	0.013349	0	0.162858	0	0.0106792	0	0	0.0080094	0	0	0	0	0	1.3616	0	0	0	0	0	0	0	0	0	0	-2.23738	11.1353	6.8254
AI1R	64.082	16.263	0.848768	0.0727515	0	3.69214	0.0879081	5.97472	2.15526	0.3001	1.02762	0.130346	0.0788142	0	0.324351	0.0181879	0.800267	0.0212192	0.100033	0	0.151566	0	0	0	0	0.336476	0	0.936676	0.048501	0.0333444	0	0	0	0	0.0788142	0	0	0	0	0	0.263724	0	0.172785	0.0303131	0	0	7.17489	6.90113	5.49875
AI2R	45.9498	20.7469	1.52737	0.0566645	0.015454	12.8062	0.29105	6.81005	1.65615	1.4604	0.54604	0.0489375	0.252415	0.0128783	0.620734	0.0489375	0.113329	0.0695428	0.576948	0	0	0.0309079	0.0128783	0	0	0.221507	0.0103026	2.23567	0.0515132	0.0952994	0.177721	0	0	0	0.19575	0	0	0	0	0	0.164842	0	0.406954	1.11784	0	0	14.1333	7.27887	5.41934
AI3R	15.6777	8.29462	3.00794	0.643928	0.523375	18.718	0.199941	1.39665	1.70538	0.367539	0.56748	0.117612	0.0411644	0.117612	0.332255	34.6133	3.30197	0.0352837	0.640988	0.0441047	0.0264628	0	0.0411644	0	0	3.793	0.0558659	0.332255	0.0441047	0.0176419	0	0.0764481	0.0294031	0	0.182299	0	0	0	0	0	0	0	2.12879	0.085269	0	0	5.12909	0.225794	6.45093
AJ1R	6.50526	4.30423	0.611396	18.7576	0	25.8009	0	1.83419	0	0	0	3.15481	0.855955	4.69552	0	0	6.79873	1.663	1.41844	1.34507	0.929323	0	0	0	0	0	1.19834	0	7.72805	0	0	0.366838	6.60308	0	1.29616	0	0	0	1.76082	0	0	0	0	0	0	0	1.28501	2.1014	2.77728
AJ2R	17.0842	2.69578	0	36.3359	15.562	4.64274	0	0.694369	3.23494	0	0	0	0	5.68293	0	0.258686	3.2295	0	0	1.61475	0	0	0	0	0	0	0	0	0	0	0	1.11371	0.59634	1.90066	0	0	0	0	0	0	0	0	0	0	0	0	-5.22659	7.86048	2.77728
AJ3R	20.1552	10.0967	2.40014	18.0561	5.55508	3.09134	0.313799	0.682724	3.26944	1.44178	0	0.580952	3.86736	3.72742	0.0381647	2.41286	4.75363	0.530065	0	1.07285	0.0212026	0	0	0	0	0	0	0	0.390128	0.182342	0	0.258672	3.71894	0.530065	0.0127216	0	0	0	0	0.139937	0.106013	0	0	0	0	0	-0.149196	-1.24308	5.49371
AK1R	66.4048	3.58425	1.30162	0.112208	0.0352655	10.0923	9.83586	0.362272	0.423185	0.468069	1.46191	0.368684	0.0352655	0.0288536	0.400744	0.109002	0.179533	0	0.109002	0	0.0160298	0	0	0	1.39459	0	0	0.567453	0	0.0320595	0	0.500128	0.0801488	0	0	0.593101	0	0	0.413568	0	0.0993845	0	0	0	0	0	5.91609	2.56517	6.01143
AK2R	34.9115	23.6023	4.79151	0.163968	0.0159413	8.90437	15.1329	0.407643	0.150304	1.79909	0.453189	0.437248	0.0979253	0.0318827	1.52581	0.0432693	0.186741	0.0182187	0.455467	0	0.111589	0	0.0774293	0	3.4661	0	0	0.145749	0.0296053	0.0296053	0.0318827	0	0.0728747	0.0159413	0.03416	0.148027	0	0	1.6579	0.0227733	0.286944	0	0	0	0	0.0364373	45.9783	29.5262	6.02078
AK3R	25.1114	27.5687	3.22569	0.230141	0.115071	12.049	18.2405	0.486266	0.159614	1.40683	0.593912	0.374907	0.0853749	0.0371195	2.90275	0.0445434	0.326652	0.0853749	0	0.0408315	0	0.0148478	0.155902	0	1.57016	0	0.0259837	0.185598	0.13363	0.107647	0	0.0259837	0.274684	0.0705271	0.0556793	0.45657	0	0	1.35857	0	0.753526	0	0	0	0	0.077951	22.0621	11.0662	6.20859
AM1R	24.9864	7.55111	0.0292679	0.0125434	0.0752603	10.5239	0.485011	5.57762	1.93168	0.330309	2.77209	22.3063	0.0209056	0	0.0459924	0.104528	0.0250868	1.04528	0.0794414	0	14.4165	0	0.129615	1.11636	0.0961659	0	0	1.13309	0	0.0878037	0.100347	0	0	0	0	1.65154	0.263411	0	0.217419	0	0.648075	0.0376301	0	0.0250868	0	0.0292679	22.4055	23.0257	6.18378
AM2R	5.01032	7.24569	0.159137	0.16411	0.626601	19.8797	0.713629	2.4144	0.452545	0.218813	4.36134	19.815	0.0273516	0.0149191	0.176542	0.0497302	0.0646493	1.3825	0.338165	0	11.3808	0	0.0870279	3.19765	0.0870279	0.00994604	0	2.94652	0.0422707	0.0124326	1.05179	0.0248651	0.0174056	0	0	0.144218	5.41811	0	1.43472	0	1.63861	0.47741	0	0.00994604	0	4.28177	15.2942	7.99838	7.11197
AM3R	6.82278	4.8595	0.176096	0	0.168602	18.1641	0.92544	0.824279	0.157362	0	1.64856	12.84	0.0149869	0	0.0824279	0.0149869	0.0786812	1.19895	4.71712	0	3.23342	0	0.0187336	2.67516	0.0599475	0.0337205	0	1.47246	0	0.0412139	11.6898	0	0	0	0.0412139	0.43462	4.08018	0	0.944174	0	2.65268	1.26639	0	0.0224803	0	3.31585	43.3935	34.6222	9.08449
AO1R	80.927	2.74401	0.184471	0.276707	0.0263531	0.411767	0.876239	0.299766	1.18918	0.174589	1.00471	8.03768	0.0625885	0	0	0.0856475	0	0.24706	0.0461179	0	0.098824	0.108706	0.273413	0.0592944	0	0	0.0395296	0.434826	0.0131765	0.368943	0	0.0362355	0	0	0	1.06071	0	0	0	0	0.0560003	0	0	0	0	0	1.16903	4.75409	4.6072
AO2R	0.19025	0	0	57.1938	4.28062	0	0	0	0	0	0	0	10.2021	15.2438	0	0	0	0	0	2.42568	0	0	0.439952	0	0	0	3.49584	0	0	0	0	2.75862	0	0.868014	0	0	0	0	0	0	0	0	0	0	0	0	3.58002	0.956129	4.55284
AO3R	75.6847	0.219239	0.1619	0.0168645	0	1.03548	7.93308	2.24298	7.96344	0.0978144	3.20426	0.215866	0.0269833	0	0	0.0269833	0	0.037102	0	0	0	0.0404749	0.141662	0	0.0539665	0	0	0.0809498	0.165273	0.138289	0	0	0	0	0	0.340664	0	0	0	0	0	0	0	0	0	0	-6.06027	0.0914316	5.55223
[truncated: 4 more columns]

## Sheet: Supplementary Table 3
Supplementary Table 3: Metadata of the recontaminated towels for Spearman's rank correlation tests
(1) Sample ID was formatted as following: <Household><1: two month/ 2: four month/ 3: six month ><B: Recontaminated>.
(2) Bacteria (genus level) with a mean abundance >0.1% were selected.
(3) Changes in whiteness (W) with washing and drying were defined using the following formula: Dw3: (W value of new towel) - (W value of recontaminated towel)
Sample ID (1)	Genus (2)																																														Dullness
ID	Enhydrobacter	Skermanella	Sphingomonas	Pseudomonas	Paracoccus	Methylobacterium-Methylorubrum	Roseomonas	Micrococcus	Dermacoccus	Kocuria	Serratia	Mycobacterium	Cutibacterium	Acinetobacter	Amaricoccus	Brevundimonas	Corynebacterium	Burkholderia-Caballeronia-Paraburkholderia	Allorhizobium-Neorhizobium-Pararhizobium-Rhizobium	Intrasporangiaceae genus	Staphylococcus	Bacillus	Dermacoccaceae genus	Aureimonas	Candidatus_Alysiosphaera	Rhodobacteraceae genus	Streptococcus	Sphingomonadaceae genus	Arsenicicoccus	Agromyces	Rhizobiaceae genus	Comamonadaceae genus	Chryseobacterium	Escherichia-Shigella	Brevibacterium	Rubellimicrobium	Williamsia	Hydrogenophaga	Carnobacterium	Rothia	Gordonia	Blastomonas	JG30-KF-CM45	Enterobacteriaceae genus	Acetobacteraceae genus	Microbacterium	Dw3 (3)
A1B	36.9241	11.2975	21.4524	0.987042	2.42871	18.8438	0.145868	0.503246	0	0.053485	0.116695	0.204216	0.0948144	0.150731	0.0826587	1.24717	0.126419	0.070503	0.0753653	0.0413293	0.0510539	0.0340359	0	1.97408	0	0	0.0340359	0.717186	0	0	0.0316048	0	0	0	0	0	0.0218802	0	0	0	0	0	0	0	0.284443	0.0802276	8.09969
A2B	32.0432	9.28424	24.7542	0.0857535	6.1895	18.0559	0.546917	0.373504	0.0190563	0.0876591	0.00952817	0.0343014	0.0114338	0	0	1.78939	0.0114338	0	0.493559	0.0743197	0.093376	0	0	1.62932	0.0057169	0	0.00762253	0.463069	0	0	1.7932	0	0.0247732	0	0.00762253	0	0	0	0	0	0	0	0	0	0.813705	0	13.3789
A3B	4.20855	17.5716	58.2797	0.0591284	4.21898	10.7753	0.424333	0.0521721	0.0452158	0.0417377	0.0173907	0.0139126	0.0417377	0	0	0.0521721	0.0556502	0	0.605196	0	0.135647	0	0	0.831275	0	0	0	0.441724	0	0	0.918229	0	0	0	0	0	0	0	0	0	0	0	0	0	0.497374	0	20.7637
B1B	85.2233	1.54196	0.83865	0.727475	0.350445	0.311775	2.10992	0.444702	0.222351	1.00541	0.113592	0.611466	0.0386698	0.391531	0	0.497873	0.425367	0	0.0314192	0.0773395	0.449536	0.0241686	0	0.628384	0	0.248937	0.087007	0.0410866	0	0	0	0.0314192	0.251353	0	0.396365	0	0.350445	0.0483372	0.0265855	0	0	0	0	0.205433	0.0362529	0.0580046	-6.16364
B2B	41.9699	20.9211	1.81264	1.14545	4.88477	1.51649	13.9054	0.702931	0.0765905	0.595704	0.0323382	0.343806	0.0578684	0.856112	0.0187221	1.5216	0.0816966	0.0561664	0.0153181	0.127651	0.243388	0.122545	0.0153181	1.59479	0.0527624	0.285938	0.0816966	0	0	0	0	0.0187221	0.689315	0	1.06376	0	0.108929	0	0.0493583	0	0.0119141	0.0119141	0.0748885	0	0.500391	0.110631	-1.56774
B3B	56.5793	23.1027	0.593323	0.255788	2.37593	1.22093	2.77148	1.19456	0.300617	0.524761	0.0210959	0.1925	0.0843837	0.585412	0.013185	0.321713	0.121302	0	0	0.0606508	0.348083	0.0263699	0	1.90127	0.0184589	0.361268	0.0448289	0	0	0	0	0.013185	0.21887	0	1.155	0	0.129213	0.0949317	0	0	0.0553768	0	0	0	0.284795	0.0474659	10.1597
C1B	4.74314	23.2409	0.643339	24.3092	0.709809	3.84104	0.460545	0	1.97987	0	3.27604	0	3.77932	0	0	0	2.55911	0.816637	0	0	0.121071	0.904473	0	0.766784	0	0	0	0.424936	0	0	0	0.27063	3.38524	0.873611	0	0	0	2.17216	0.935334	0	0	8.40376	0	0	0	0.372709	4.12553
C2B	20.6821	24.0119	4.75741	6.75615	0.0134898	23.1912	4.00648	1.37821	2.61253	1.09492	0.978012	1.94029	1.47938	0	0	0.422681	1.04096	0.690229	0.395701	0	0.0899321	0.272045	0.50362	0.103422	0	0.206844	0	0.899321	0	0	0	0	0	0.21134	0	0	0	0	0	0	0	0	0	0	0	0	-4.96459
C3B	3.4138	27.1043	5.93873	6.79927	0.662149	37.9126	6.06498	0.989359	0.749749	0.358127	1.7185	0	0.656996	0	0	0.656996	1.50207	0.739443	0	0	0.474068	0.422539	0.409657	0.0953289	0	0	1.21351	0.528174	0	0	0	0	0	0.056682	0	0	0	0	0.139129	0.20354	0	0	0	0	0	0	3.2189
D1B	54.7047	0.11866	0.0922915	1.8678	21.3984	0.160411	0.281269	6.59444	0.397732	1.15364	0.296651	0.894348	0.235123	7.21851	0.498813	0.362574	0.503208	0.0285664	0	0.101081	0.26369	0.00659225	0.103279	0	0.0659225	0.0571328	0.147227	0	0	0	0.487826	0.0681199	0	0.00659225	0	0	0	0	0.103279	0	0	0	0	0	0	0.27248	-9.37346
D2B	33.937	0.274705	1.25198	1.39054	21.5072	3.70731	1.45132	19.5478	0.775495	4.52656	0.170171	0.0875167	0.447308	0	0.311171	1.80868	2.74705	0.114258	0.471618	1.14258	0.384101	0.0486204	0	0.0802237	0	0.0267412	0.23824	0	0	0	0	0	0	0.0194482	0.420566	0	0	0	0	0.0145861	0	0	0.0632065	0	0.0388963	0.471618	-11.5446
D3B	20.4222	1.75208	0.415378	4.10381	22.7552	8.78541	0.518442	16.8681	0.490334	2.78585	0.306068	0.902589	0.140542	0.0687092	0.318561	2.34861	2.74837	0.22799	0.771417	2.34548	5.67788	0.0312315	0	0	0.281083	0	0.0905712	0	0	0	0.0624629	0.262344	0	0	0.443487	0	0	0	0	0.0406009	0	0	0	0	0	0.324807	-12.6312
E1B	72.4888	0.232855	15.9836	0.154419	0	3.95608	1.60057	0.0514731	0.0441198	0.220599	0.0465709	2.09814	0.115202	0.0465709	0.0122555	0.250012	0.0661797	0.0465709	0.453454	0	0.286779	0.0122555	0	0	0.154419	0.0171577	0	0.0441198	0	0	0	0.0049022	0	0.0196088	0	0	0	0	0.0318643	0	0	0.0294132	0.0343154	0	0.0441198	0.0465709	-6.69751
E2B	50.1508	0.181402	12.5802	0.204077	0.052153	4.6779	18.3511	0.0702932	0	0.0952359	0.0113376	0.215415	0.126981	0.00680257	0	0.0748282	0.120179	0.0362804	0.151924	0.0317453	0.571416	11.2242	0.0589556	0	0.113376	0	0	0	0	0	0	0	0.0136051	0	0	0	0.0226752	0	0	0	0	0.0113376	0.0748282	0	0.0634906	0	0.855964
E3B	52.6846	0.31251	8.24163	1.44287	0	7.82938	19.605	0.0565178	0.0698162	0.0166229	0.139632	0.0299212	0.123009	0.246019	0	0.0664916	0.0698162	0.0299212	0.359054	0	0.216098	7.30077	0	0	0.0831145	0	0	0	0	0	0	0.086439	0	0	0	0	0	0	0.086439	0	0	0	0	0	0	0.0465441	-1.28904
F1B	64.3722	0.116052	27.0195	0.682656	0.0227552	3.00369	0.134256	0	0.0841942	0.113776	0.0273062	0.179766	0.159286	0.559778	0	0.689483	0.0318573	0	0.0932963	0	0.052337	0.0204797	0	0	0	0	0	0.28444	0	0	0	0.0113776	0.0364083	0	0.0136531	0	0	0	0.0500614	0	0	0	0	0	0	0.0682656	-3.50532
F2B	17.1744	0.0180846	62.613	1.62963	0.198931	13.0752	0.534501	0.0622915	0.454125	0.0803762	0.283326	0.239119	0.530483	0.641	0	0.0663103	0.584737	0.0622915	0	0	0.0783668	0.164771	0	0	0	0	0	0.010047	0	0	0	0.084395	0	0.0361693	0.725395	0	0	0	0.138649	0	0	0	0	0	0.0663103	0.0803762	10.3523
F3B	34.3174	0.0248339	37.5644	0.67362	0.0217297	26.0042	0.0558763	0	0.0713975	0	0.0186254	0.130378	0.0496678	0.745018	0	0.0186254	0.0434594	0.0248339	0.012417	0	0	0	0	0	0.0155212	0	0	0	0	0	0	0	0.0372509	0.0341466	0	0	0	0	0	0	0	0	0	0	0.0217297	0	-5.86158
G1B	5.27807	77.4514	1.7781	3.46536	0.155746	2.52006	0.436955	0.65327	0.0216314	0	0.501849	0.80469	1.26111	0.00432629	0	1.07292	0.330961	1.07941	0.19252	0.105994	0.138441	0	0	0.311493	0	0	0	0.393692	0	0	0	0	0	0.259577	0	0	0	0	0.26174	0	0	0	0	0	0.220641	0	-14.7706
G2B	5.98417	69.7889	1.62525	5.65648	0.989664	6.95623	1.36574	0.0791731	0.182538	0.288102	1.51748	1.09963	0.569606	0	0.151748	0.171542	0.448647	0.939081	0	0.043985	0	0.252914	0	0	0	0.239718	0.125357	0	0	0	0	0	0	0.173741	0	0	0.191335	0	0.239718	0	0	0	0	0	0.0989664	0	-4.59472
G3B	1.59814	50.5977	0.617365	9.31302	3.24445	21.5377	1.01581	0.779369	0.0350278	1.11213	3.23569	0.932615	0.687421	0	0	0.11384	0.332764	0.109462	0.341521	0	0.166382	0.214545	0	0	0	0	0	0.827532	0	0	0	0.875695	0	0	0	0	0	0	0.407198	0	0	0	0	0	0	0	5.36566
H1B	23.189	1.18369	5.17327	20.9206	1.02212	12.8524	0	0.0659435	0	0.0296746	4.06542	5.75357	1.3947	0	0.939695	0.267071	3.32355	1.4013	0.0329717	0	2.88503	0	0	0.389067	1.00564	2.40364	0	0	0	0	0	0	0	0.557222	0	0.494576	0.0626463	0	0.484685	0	0	0	0	0	1.32217	0.0131887	1.35453
H2B	18.2775	1.30589	9.68718	5.88018	0.0221337	10.8381	0.518912	0	1.48296	0	0.617284	1.34032	3.02986	0	0	0	0.986179	0.823865	0.277901	0.0836162	2.30928	0.381191	0	0	1.76824	5.39078	2.35109	0.115587	0	0	0	0.322168	0	0.132802	0	0	0	0	0	0.110668	0	0	0	0	0.509075	0	9.79825
H3B	7.28022	0.583791	0.824176	22.2871	0.343407	15.9341	0.51511	0	0	0	2.85027	8.34478	2.40385	0.103022	0	0.549451	4.94505	1.0989	1.20192	0	1.88874	0.583791	0	0	5.11676	6.55907	0.274725	0.824176	0	0	0	0	0	1.44231	0	0	0	0	0.686813	0	0	0	0	0	0	0	8.0443
I1B	0.131153	0	0	72.4425	3.88057	0	0	0	0	0	7.3214	0	4.19688	0.948928	0	2.59219	0	1.72041	0	0	0.0154297	0	0	0	0	0	1.41182	0	0	0	0	0	0	0.462892	0	0	0	0	1.21123	0	0	0	0	0	0	0	-22.2548
I2B	2.38181	0.024897	0.973748	44.8698	0	0	0	0.0359623	1.19229	0	12.4817	0	4.24908	0	0	0	0	5.95867	0	3.24767	0	0	0	0	0	0	0	0	0	0	0	0.0331959	0	2.51459	0	0	0.450912	8.90758	2.63631	0.0857562	0	0	0	0	0	0	-18.7967
I3B	1.38038	91.3635	0.271442	1.52273	0	0.211857	4.56818	0.0132411	0	0	0.142342	0.036413	0.135721	0.0695157	0	0.0794465	0	0.185375	0	0	0.00993082	0	0	0	0	0	0	0	0	0	0	0	0.00993082	0	0	0	0	0	0	0	0	0	0	0	0	0	-19.6896
J1B	48.6905	36.417	0.351476	1.68508	0	1.28741	4.98895	0.0542278	0	0	0.0301265	0.132557	0.0120506	0.471982	0.536252	0.672826	0.0863627	0.0180759	0.10243	0	0.122515	0.0180759	0	2.13095	0.0723037	0.471982	0.0401687	0	0	0	0.0341434	0.0381603	0.0582446	0.0120506	0.0100422	0	0	0	0	0	0	0	0.0220928	0	0.136574	0.0301265	3.35281
J2B	31.6057	51.2223	0.802768	2.32582	0.0382271	2.41635	2.97366	0	0.0321912	0.140837	0.0281673	0	0.507012	2.35801	0.0623705	0.362151	0.152908	0.0905378	0.183088	0	0.162968	0	0	0.148884	0.0684063	0.39233	0.185099	0	0	0	0	0.0764541	2.1045	0	0.0502988	0	0.0080478	0	0.0663944	0.0563346	0	0	0	0	0.15492	0.0241434	10.4057
J3B	3.06231	89.3902	0.0266578	0.883039	0	0.336554	5.17161	0	0	0	0.123292	0.0466511	0	0	0.0266578	0.363212	0	0	0	0	0.05998	0	0	0.0333222	0.0766411	0.0366544	0	0	0	0	0	0.0133289	0	0	0	0	0	0	0	0.0333222	0.02999	0	0	0	0.0466511	0	8.57413
K1B	3.39419	6.67938	1.11424	18.6938	6.2464	0	0	0.466285	0.920459	0.369395	4.16932	2.20123	3.51531	8.95631	7.05483	1.38674	2.6554	1.16874	0.00605565	0.0878069	1.40491	2.09223	6.64608	0	0.650983	1.3928	0.97496	0	0	0	0	0.669149	0.693372	0.263421	0	0	0.115057	0.018167	0.118085	3.89984	0.393617	0	0	0	0	0.551064	-1.30237
K2B	3.47162	0.998043	0.0391389	27.6869	0.16047	0	1.76517	0.109589	2.37182	0.0900196	8.5362	5.03327	11.1898	6.53229	0.246575	0.0156556	3.85127	2.87671	3.62427	0.407045	0.195695	1.92172	1.2955	0	1.69472	0.774951	0.60274	0	0	0	0	0	0	0.986301	6.24266	0	0.0469667	0	0.457926	0	0	0	0	0	0	0	8.24892
K3B	2.6152	88.5983	0.169477	0.940888	0	0.62531	6.18882	0	0.0759723	0	0.134413	0.0613622	0.0759723	0.0321421	0.0175321	0.0525962	0.0584402	0.0496742	0.0175321	0	0.0292201	0.0233761	0	0	0	0	0	0	0	0	0	0	0	0.0175321	0	0	0	0	0	0	0	0	0	0	0.128569	0	2.30563
L1B	10.8737	9.55509	4.07561	2.8769	19.9908	0.650069	11.2702	1.89258	0.0345781	4.77639	0.214385	0.0899032	0.172891	2.83771	13.7967	0.230521	0.4426	0.0599355	0.182112	2.17151	0.32734	0.0345781	0	1.16413	0	1.53988	2.85615	2.04703	0	0	0.299677	0	0.707699	0	0.348087	0	0	0	0.0645459	0.599355	0	0	0	0	0	0.16828	-0.922767
L2B	9.98104	30.2667	2.71629	1.4818	16.372	0.362722	10.7498	0.964511	0.278224	1.35815	0.513169	0.0556449	0.426611	0.261737	14.5728	0.305016	0.337991	0.26792	0.478134	0.943902	0.333869	0.0288529	0	0.467829	0	1.02428	1.65286	0.997486	0	0	0.436915	0	0	0.0432793	0	0	0.0350357	0	0.0638885	0.113351	0	0	0	0	0.0453403	0.197848	-4.69568
L3B	12.6416	22.2672	1.96045	8.6949	23.0514	0.805722	11.7196	1.36585	0	0.568745	0.672153	0.555819	1.06855	0	6.6052	0.542893	0	0.172347	0.206816	0.926365	0.275755	0.0301607	0	0.573054	0	1.0427	1.61575	0.452411	0	0	1.26675	0	0	0	0	0	0	0	0.107717	0	0	0	0	0	0	0	-1.10507
M1B	2.5641	3.33998	0.325131	53.8314	0.0295574	1.54437	5.24643	0	0	0	2.89662	0	4.46316	0	0	0	0	5.80802	0	0	0.938447	2.9853	0	0.0295574	0	0	0.0443361	0	0	0	0	0	0	2.1503	0	0.0147787	0	0	0	1.55176	0	0	0	0	0	0	-11.2798
M2B	2.24104	4.74437	0.529198	31.8669	0.101238	2.69201	1.96493	0	1.42653	0	2.58157	0	7.95638	0.704063	0	0.805301	0	3.00032	0	0	0.460172	0.911141	0	0.0690258	0	0	4.17376	0	0	24.0486	0	0	0	0	0	0	0	0	1.71644	1.64281	0	0	0	0	0	0	-7.3
M3B	2.9877	18.739	12.1924	31.3489	0	0.900703	6.15114	0.439367	0.0878735	0	6.15114	0	3.0536	0.307557	0	0	0	3.99824	0	0	0.373462	0	0	0	0	0.483304	6.0413	0	0	0	1.71353	0	0	2.17487	0	0	0	0	0	0	0	0	0	0	0	0	3.64511
N1B	13.6434	2.35369	21.8422	5.23833	5.83564	14.3165	7.7058	0.639977	0	2.34895	1.4601	7.78876	0.398208	0	0.805897	0.123255	0.101922	0.504871	0.808268	0.621015	0.393467	0.154069	2.53384	0.426651	0.917301	0.144587	0.24651	0.673161	2.06689	0	0.538055	0	0	0	0	1.45773	0.644718	0	0.101922	0	0	0	0	0	0	0.066368	8.19435
N2B	8.09422	0.959165	10.2635	2.61848	10.4982	21.7532	4.45182	0	0.267109	3.90141	0.380428	5.47574	0.036424	0	1.53385	0	0	0.267109	0.550407	0.732527	0.0930835	0.0526124	3.14865	0.416852	0.105225	0.64349	0.267109	1.43672	13.1369	0	0.874175	0.344004	0	0	0	1.48124	1.20199	0	0	0	0	0	1.17771	0	0.0283298	0.0283298	6.65654
N3B	8.47594	0	7.64706	0.501337	4.87299	14.2914	9.79947	0	0	2.8877	0	5.92914	0.127005	0	3.68984	0.0467914	0	0	0.427807	0.240642	0.19385	0	3.59626	0.187166	0.554813	0.320856	0.274064	0.528075	9.70588	0	0.635027	0	0	0.120321	0	8.21524	0.902406	0	0	0	0.0935829	0	0.715241	0	0.0467914	0	13.0094
O1B	31.1513	0.127653	1.12095	0.666188	4.8907	0.27924	6.29089	19.1878	13.7586	7.93442	0.0199457	0	0	0.0319132	0	4.91064	0.127653	0.0079783	0.135631	6.21509	0.0159566	0	0.0837721	0	0.0478698	0	0	0	0	0	0.00398915	0	0.0199457	0.0478698	0.0359023	0	0.271262	0	0.0438806	0	0	0	0.319132	0	0	0.191479	-2.12635
O2B	46.5703	0.0840908	0.568614	0.192208	2.54275	0.216234	4.88528	14.3875	14.6318	6.89945	0.0480519	0	0.0280303	0.0160173	0	1.19329	0.0800865	0.0440476	0.0920995	4.39274	0	0	0.0440476	0.0280303	0.0160173	0	0.0200216	0	0	0	0	0	0.00800865	0	0.0240259	0	0.108117	0	0	0	0	0	0.772835	0	0	0.100108	-1.19992
O3B	24.335	0.0934579	1.00647	0.201294	6.10352	0.280374	14.6154	6.85838	23.3861	8.00144	0	0.0647017	0.186916	0.0431344	0	1.26528	0.0862689	0	0.201294	6.34076	0.201294	0	0	0.222861	0.0718907	0	0	0.222861	0	0	0	0	0	0	0.0431344	0	0.172538	0	0	0	0	0	3.64486	0	0	0.0718907	2.6896
AB1B	73.1625	0.0311219	2.34106	1.93993	0.010374	3.47355	8.86111	0.55155	0.0812629	0	0.0708889	0.150423	0.108927	1.97624	0	1.69269	0.297387	0.01729	1.33479	0	0.651832	0.0501409	0.0968238	0.022477	0.00864499	0.0518699	0.0328509	0	0	0	0.027664	1.3296	0	0	0.0328509	0	0	0	0	0	0	0	0	0	0	0.0691599	-13.38
AB2B	73.2846	0.368805	0.0299031	3.01822	0	0.261154	13.5521	3.33719	0.175432	0	0.364818	0.25318	0.851242	1.08648	0.0398708	0.986803	0.261154	0.0897093	0.422631	0	0	0.0179419	0.229257	0	0	0.179419	0.0159483	0	0	0	0	0.0199354	0	0.193373	0.0857223	0	0	0	0.101671	0	0.0677804	0	0	0	0	0	-14.3553
AB3B	77.6198	0.0664297	0.0797157	1.0197	0.0332149	0.0996446	10.6454	5.00548	0.229183	0	0	0.0830372	0.139502	0.986482	0	2.82326	0.0166074	0.0166074	0.614475	0.0199289	0.136181	0	0	0.0265719	0	0.0498223	0	0	0	0	0	0	0	0	0	0	0	0	0	0	0	0	0	0	0	0	-12.6905
AD1B	47.7857	3.61255	14.632	0.32684	7.57576	1.50433	3.88528	3.26407	0.528139	5.07792	0.0411255	0.24026	0.357143	0.0367965	0.365801	0.380952	0.569264	0.038961	0.978355	0.0519481	1.92424	0.0562771	0.482684	0.0952381	0.712121	0.614719	0.194805	0.112554	0	0	0.0108225	0.0714286	0.0194805	0	0.0541126	0.0606061	0.0194805	0.017316	0.021645	0	0.0108225	0	0.158009	0	0.556277	0.047619	4.75064
AD2B	37.9193	6.81173	38.2951	0.0918195	2.0606	4.23865	4.98815	0.589353	0.194316	1.35594	0.0106767	0.0469774	0.100361	0	0.0277594	0.0875488	0.136662	0.019218	0.40785	0	0.313895	0.019218	0	0.158015	0.264782	0.0512481	0	0.12812	0	0	0	0	0.0106767	0	0	0.0427068	0	0	0	0	0.0106767	0	0.0469774	0	0.262647	0.0277594	14.5459
AD3B	10.1094	8.09965	54.2266	0.195253	2.04006	11.291	6.56455	0.525164	0.235651	0.908938	0	0.265948	0.053863	1.17152	0.0201986	0.0740616	0.10436	0	0.589126	0	0.323178	0	0.0403972	0.124558	0.414072	0.0403972	0.00673287	0	0	0	0	0.0336644	0.0235651	0	0	0.0235651	0	0	0.0134657	0	0	0	0.0908938	0	0.205353	0	16.6087
AE1B	69.2023	0.0306013	18.1185	0.244811	1.73917	1.21895	1.83353	1.17305	0.155557	0.979242	0	0.0586525	0	0.0382516	0	1.07105	0.0943541	0	1.35156	0.0382516	0.0816035	0	0	0.0663029	0	0	0	0.323864	0	0	0	0.0535523	0.0433519	0.0153007	0	0	0.00765033	0	0.0204009	0	0	0	0	0	0.140256	0	0.69904
AE2B	59.5622	0.131152	14.3361	2.01498	9.02089	1.61913	4.10387	1.45937	0.505532	0.872758	0.424456	0.329073	0.875143	0	0	0.510301	0.290919	0.43161	1.59052	0.0953834	0.197921	0.0596147	0	0.393457	0	0.135921	0	0.298073	0	0	0	0.0190767	0	0	0	0	0	0	0	0	0	0	0	0	0.278997	0	7.55703
AE3B	63.1344	0.185591	11.6527	0.28295	3.73311	2.75648	11.0959	1.72508	0.197761	1.31739	0.0669344	0.788	0.0304247	0	0	0.0973591	0.0730194	0.0243398	0.870147	0.0456371	1.01314	0.0882317	0	0.273823	0	0	0.0243398	0.0334672	0	0	0	0	0	0	0.0121699	0	0.0182548	0	0	0	0	0	0	0	0	0	1.42348
AF1B	42.1672	7.47364	27.8477	0.353677	1.52965	3.49919	0.419992	0.0574725	0.0530516	1.0124	0	1.38155	0.0198943	0.0265258	0.486306	1.29092	0.00884193	0	1.74186	0.0309467	0.00884193	0.0198943	0	0.271889	0.0154734	0.0243153	0.0154734	1.4766	0	0	0.101682	1.97396	0.150313	0	0	0.0243153	0.789142	0	0	0	0.059683	0	0	0	0.0729459	0.0265258	4.64233
AF2B	26.8751	11.1065	20.1255	0.690103	1.17253	14.2802	1.52731	0.02596	0.0432666	0.31801	0.0216333	0.20768	0.118983	1.95565	0.592753	0.11682	0.00865333	0	4.14927	0.05192	0.0108167	0.00648999	0	0.861006	0.00865333	0.0151433	0	2.9854	0	0	0.183883	4.7788	0.0778799	0	0.00648999	0	0.0475933	0	0	0	0	0	0	0	0.108167	0	12.6428
AF3B	22.6478	14.2222	17.5677	0.0861953	1.36296	9.40337	0.926599	0.0350168	0.0969697	0.188552	0.0430976	0.83771	0.0242424	0.0538721	0.382492	0.0161616	0	0	4.87542	0.0457912	0.0215488	0	0	1.74545	0	0.0457912	0.0161616	7.16229	0	0	1.23098	7.40202	0.0188552	0.0161616	0	0	0.0350168	0	0	0	0	0	0.0107744	0	0.193939	0	16.8736
AG1B	48.6171	1.64768	1.80007	0.0914321	8.62319	1.29719	6.95646	16.0578	0.653358	0.569546	0.0133338	0.731456	0.0361919	0.0419064	0.154292	4.35636	0.0247628	0.0057145	0.838127	2.06675	0.0761934	0	0.270486	3.07821	0	0	0.034287	0.0400015	0	0	0.500971	0	0.108576	0	0.0247628	0	0.586689	0.00761934	0	0	0	0	0	0	0	0.0971466	5.59599
AG2B	41.826	6.10379	1.6571	0.198131	20.0901	1.40493	13.3468	8.31476	0.189125	0.968141	0.0742992	0.180119	0.121581	0	0.308454	0.6034	0.0675447	0.0292694	0.405268	0.646178	0.0833052	0.0337724	0.162107	1.35089	0.0157604	0	0.110323	0.103569	0	0	0.659687	0	0.0157604	0	0	0	0.128335	0.0833052	0.0135089	0	0	0	0.0495328	0	0.0112575	0.0135089	3.85952
AG3B	44.4287	5.72018	1.9254	0.14153	20.8403	1.70131	17.5203	0.987764	0.286009	0.625092	0	0.919947	0.0560224	0.117942	0.227038	0.374466	0.0235884	0	0.645732	0.244729	0.0855079	0.0235884	0.185759	0.483562	0	0.0176913	0.126788	0.492407	0	0	0.790211	0.377414	0	0.0058971	0	0	0.218193	0	0	0	0	0	0.0412797	0	0	0	8.51712
AH1B	86.0143	0	1.46488	2.02172	0.536044	0.184843	1.64741	1.15989	0.235675	0.459797	0.411275	0.17329	0.753235	0.113216	0	0.519871	0.341959	0.115527	0.304991	0.145564	0.205638	0.0600739	0.120148	0	0.0808688	0	0.0785582	0	0	0	0	0	0.12939	0.0623845	0.522181	0	0.00693161	0	0.224122	0	0	0	0	0	0.152495	0	-19.3338
AH2B	63.5152	0.165013	0.450612	0.236942	0.296177	0.0444266	4.58017	26.2646	1.01335	0.13328	0	0.0232711	0.626203	0.0148089	0	1.15932	0.0909687	0.042311	0.285599	0.205208	0.0401955	0	0.344835	0	0	0.0275022	0.0317333	0.0232711	0	0	0.0338488	0	0	0.0105778	0.0719287	0	0	0	0	0	0	0	0.01904	0	0	0	-16.2326
AH3B	25.4884	0.445475	2.57352	1.99561	1.36953	0.0601993	21.3105	36.3543	2.95578	0.692291	0.367215	0.0180598	0.758511	0.0662192	0	1.05048	0.228757	0.0601993	0.866869	0.291966	0.0601993	0.162538	0.586943	0	0	0	0.237787	0	0	0	0.078259	0	0	0.0421395	0.114379	0	0	0	0.0993288	0.0270897	0	0	0.114379	0	0	0.0571893	-13.3727
AI1B	69.7786	0.0254033	13.7241	0.122783	3.65595	0.385283	0.0105847	1.88408	0.0381049	1.18972	0	2.63559	0.0889115	0.173589	0.17994	1.5242	0.0381049	0.00635082	0.215928	0.0211694	0.069859	0	0	0.033871	0.0486896	0.0444557	0.0190525	0.0275202	0	0	0	0.171472	0.0867945	0	0.15877	0.035988	0.275202	0	0.0148186	0	0.0105847	0.0592743	0	0	0.190525	0.0994962	0.273759
AI2B	45.4901	0.0338138	19.1935	0.156389	21.0935	0.866478	0.185976	3.39194	0.0845344	0.420559	0.029587	0.697409	0.126802	0.249377	0.0655142	2.58887	0.190202	0.00422672	0.25149	0.0507207	0.348705	0	0	0.213449	0.0190202	0.0845344	0.0211336	0.171182	0	0	0.0147935	0.304324	0.0507207	0	0.680502	0.25783	0.665709	0	0.00422672	0.0169069	0.0169069	0	0	0	0.325458	0.128915	6.85443
AI3B	4.62032	0.236117	5.01968	0.626731	59.4899	0.583005	0.0816208	0.0874508	0.364378	0.0408104	0.174902	3.34062	0.0699606	20.6792	0	0.489725	0	0.145751	0.104941	0.0204052	0.0233202	0.0145751	0	0	0.0262352	0.224457	0	0.0816208	0	0	0	1.18642	0	0.0145751	0.113686	0.192392	0.0233202	0	0	0	0	0.0320653	0	0	0	0.0437254	4.90329
AJ1B	4.47348	3.55442	6.3079	16.5172	30.0373	0.018455	0.0479829	0	0.605322	0	4.10438	3.59133	2.9085	0.206695	4.1376	0	0	1.66833	0.760344	0	0	1.53176	1.30661	0	12.3205	0	0	0	0	0	1.45056	0.199313	0	0.867383	0	0	0	0	0.420773	0	0	0	0	0	0	0	-0.816392
AJ2B	10.4945	16.0302	6.30226	20.7353	2.48913	2.41387	4.88349	11.3028	1.37697	0.590924	2.48355	3.31977	4.21452	0.75538	1.38254	0.699632	0.423682	2.2299	0	0.23414	1.48289	1.66128	0	0	0.875237	0	0	0	0	0	0	0	0	0.256439	0	0	0	0	0	0	0	0	0	0	0	0	-13.0871
AJ3B	51.0599	3.38724	14.2774	10.6643	5.21562	0.455274	0	0.495338	1.73004	0	1.66812	1.7956	0	1.30755	1.08902	0.0619172	0.316871	1.22742	0.0145688	0.338724	0	0.222174	0	0	0.859557	0	0	0	0	0	0	0	0	0.18211	0	0	0	0	0	1.12179	0	0	0	0	0	0	1.09389
AK1B	48.7633	0.0305904	7.52087	0.286239	8.71389	2.43849	4.60822	0.552812	0.535332	1.54044	0.0218503	1.72399	0.168247	0.849976	0.126732	0.515667	0.0502556	0.0152952	0.76039	0	0.0917712	0.00874011	0.836866	0.170432	0.0371455	0.264388	0.0699209	0.310274	0	0	1.30883	0.0131102	0.0655508	3.89372	0	0	0.745095	0	0	0	1.89005	0	0.0393305	7.89888	0.0305904	0.35179	3.35091
AK2B	31.5275	0.0241944	17.7697	0.0857803	15.6846	3.74354	2.43484	0.677444	0.772022	0.800616	0.0395909	0.642252	0.272737	0.279336	0.145167	2.31387	0.114374	0.0417904	0.789618	0.204553	0.156164	0	0.673045	1.2867	0.325525	0.444298	0.0197954	0.281535	0	0	5.08303	0.0241944	1.88497	0.0153965	0	0	0.345321	0	0	0.0153965	4.7707	0	0.369515	0	0.0637853	1.65182	16.4521
AK3B	8.88658	0.0726141	4.08714	0.387275	25.6017	4.57469	1.40041	4.44675	35.3734	2.10581	0.14177	0.297372	0.117566	0	0.421853	0.670816	0.473721	0.0207469	0.4426	0.826418	0.0103734	0	1.09613	2.07469	0.0414938	0.746888	0.0103734	0.0172891	0	0	2.25104	0	0.0276625	0	0	0	0.722683	0	0	0	0.681189	0	0.165975	0	0	0.356155	10.9958
AM1B	44.8879	0.166552	1.56143	0.0312285	6.11455	0.0104095	0.124914	2.88343	28.1432	3.5205	0	0.0229009	0.0270647	0.64539	0	0.587096	0.201944	0	0.0458018	0.455937	0.430954	0	2.34839	0	0	0	0.0187371	0.0353923	0	0	0.0229009	0.0041638	2.64402	0	0.00832761	0	1.17836	0	0	0	0.201944	0	0.0832761	0.0145733	0	0.447609	-0.620196
AM2B	44.7442	0.152927	1.72837	0.0115417	10.6385	0	0.279886	3.54907	24.3876	1.85244	0	0	0.054823	0.158698	0	0.320282	0.349136	0	0.0403959	0.758865	0.392417	0	0.542459	0	0	0	0	0.0663647	0	0	0	0	6.01322	0	0.0173125	0	0.741553	0	0	0	0.20775	0	0.0432813	0	0	0.568428	7.29579
AM3B	38.5646	0.109824	0.315743	0.0109824	15.4769	0	0.260831	4.57416	32.3047	2.37768	0	0	0.00823678	0.0796222	0	0.107078	0.661688	0	0	0.944484	0.214156	0	1.02685	0	0.00549119	0	0	0.0576575	0	0	0	0	0.0192192	0	0	0	0.645214	0	0	0	0.222393	0	0.0247103	0	0	0.39262	8.77129
AO1B	76.5536	0.186895	1.0969	0.843253	0.511737	0.135721	1.31049	3.24396	0.302592	1.68206	0.404939	0.0222494	0.075648	0.0956725	0.289242	0.505062	3.41529	0.0422739	0.313717	0.413839	2.33174	0.117922	1.9713	0	0	0.244744	0.18467	0	0	0	0	0.0177995	0.0200245	0	0.0489487	0	0.0289242	0	0	0.19357	0	0	0	0	0	0.0244744	-3.58506
AO2B	79.7171	0.0879952	2.68386	0.18699	1.16374	0.695162	3.40542	1.23193	0.670964	1.12194	0.0681963	0.101195	0.228788	0.00879952	0.112194	2.57386	0.486174	0.0483974	0.387179	0.457575	1.13734	0	1.04274	0.391579	0	0.120993	0.107794	0	0	0	0.459775	0.0263986	0.0329982	0	0	0	0	0	0.0197989	0	0.0901951	0	0	0	0.017599	0.167191	2.62389
AO3B	84.8725	0.173409	0.725163	0.20809	0.532837	0.520226	4.8712	2.48447	0.195479	0.980547	0.0599048	0.0504461	0.0693634	0.11981	0.11981	1.41249	0.889113	0.0409875	0.14188	0.0252231	0.308983	0	0.400416	0.0315288	0	0	0.138727	0	0	0	0.0189173	0.0126115	0.0283759	0	0.0189173	0	0.0409875	0	0	0.122962	0	0	0	0	0	0	-6.1517
